# Supplementary material
Source: publisher figshare collection journal article supplement (https://tandf.figshare.com/ndownloader/files/13310903)
Supplement: Supplementary file 1 [file 13310903]

**Table 1: Mapping the financial centres of Frankfurt and Paris**

|  | **Frankfurt** | **Paris** |
| --- | --- | --- |
| **Political Actors** | **State and local level government**  State of Hesse  City of Frankfurt  **Marketing and Lobbying initiatives**  Frankfurt Main Finance (FMF) Frankfurt-Rhein-Main (FRM)  Hesse Trade & Invest | **National government**  President’s Office  National government  Trésor  **Local/regional politics**  Conseil Régional Île-de-France  Paris Mayor’s Office  **Marketing and Lobbying initiatives**  Paris Europlace  Choose Paris Region  Defacto |
| **Economic Actors** | **Global banks**  Deutsche Bank  Commerzbank  Goldman Sachs  JP Morgan  **Trade associations**  Hessischer Industrie und Handelskammer (IHK, Chamber of Commerce)  Verband der Auslandsbanken in Deutschland (VAB, Association of Foreign Banks in Germany)  **Market infrastructure**  Deutsche Börse  Eurex  Clearstream  **Regional banks**  KfW  Helaba | **Global banks**  BNP Paribas  HSBC  Société Générale  **Trade associations**  Association Française de la Gestion financière (AFG, French Asset Management Association)  La Fédération bancaire française (FBF, French Banking Federation)  **Market Infrastructure**  Euronext Paris |
